# Supplementary material for: Sycp1 Is Not Required for Subtelomeric DNA Double-Strand Breaks but Is Required for Homologous Alignment in Zebrafish Spermatocytes
Source: Front Cell Dev Biol. 2021 Mar 26;9:664377. doi: 10.3389/fcell.2021.664377 (PMC8033029; doi:10.3389/fcell.2021.664377)
Supplement: Supplementary Table 1 — List of primers used in this study. [file Table_1.xlsx]

## Sheet: Primers
Supplementary Table 1. Primers used in this study
Name	Sequence (5' to 3')	Used in
sycp1Ex3_F	TCACCAAGGGCTGGTAAGG	Genotyping sycp1del5
sycp1Ex3_R	ACAACACAGGCCTTAAACCATTG	Genotyping sycp1del5
its_dCAP_F1	CTAACTATCTACATTTTTTTTTACAGC	Genotyping isa
its_dCAP_R2	ACACTTGCAGGTCATAATCTAAGC	Genotyping isa
sgRNAsycp1Ex3	TAATACGACTCACTATAGGAGGCTGCAGTCTTGCCAAGTTTTAGAGCTAGAA	template for the sycp1 sgRNA
sgRNAccdc36Ex7_F	TAATACGACTCACTATAGGGCTTCCAGATCTCGTTGGGTTTTAGAGCTAGAA	template for the iho1 sgRNA
sgRNA_tail_R	AAAAGCACCGACTCGGTGCCACTTTTTCAAGTTGATAACGGACTAGCCTTATTTTAACTTGCTATTTCTAGCTCTAAAAC	universal reverse primer for sgRNA
spo11Ex1_F	CTGGGGAACTTCTGACGCTA	genotyping spo11 knockout
spo11Ex1_R	TGCTAGTCACCTGCTGATGT	genotyping spo11 knockout
pET_hormad1cds754_F	CGCGCGGCAGCCATATGGCTTCAGAGGATGGGATGATG	Cloning of hormad1 Ct cDNA
pET_hormad1cds1071stop_R	TGCTCGAGTGCGGCCGCATTACTTGGGTACACTGAC	Cloning of hormad1 Ct cDNA
pET_ccdc36cds1_F	CGCGCGGCAGCCATATGGCTATGAAGCCCAGTGTCTGG	Cloning of iho1 Nt cDNA
pET_ccdc36cds918_R	TGCTCGAGTGCGGCCGCACTAAGGACATTGGTTCTGTTC	Cloning of iho1 Nt cDNA
sox9b_F1	CGGGCTGAAGATGAGTGTGTCC	Validation of Fosmid CH1073-175H21
sox9b_R1	GCTTGAGCCCAAACCATAAACG	Validation of Fosmid CH1073-175H21
sycp1 3078gF	AGTCCTCACTAACGTCTGAAAT	Sequencing of the sycp1 gene
sycp1 3773gR	CCATTCACTCACATTTTTATCA	Sequencing of the sycp1 gene
sycp1 3254g F	CAAAACTAAGCTCAGTGATGAA	Sequencing of the sycp1 gene
sycp1 3541gR	AAATAGGTGGATGGAAATGTAG	Sequencing of the sycp1 gene
Z20932f	TGTGGAAATGAGGAAAAGGC	Mapping of the isa mutaiton
Z20932r	CTGGTGTCAGACAGAGCCTG	Mapping of the isa mutaiton
Z11919f	CAAATATGAACCCACCCCAC	Mapping of the isa mutaiton
Z11919r	GCTTCACACACCTGGAACAA	Mapping of the isa mutaiton
A4879f	GTGCTGAAACAATCTTTCCTCC	Mapping of the isa mutaiton
A4879r	CTGCAGCATCTTTAAATTCGTG	Mapping of the isa mutaiton
A4891f	GAATGCAAAAACCTTGAAGCTC	Mapping of the isa mutaiton
A4891r	AATGTCAGGTGCAAACCTACG	Mapping of the isa mutaiton
Z4950f	AAACGGATTCACAGACGAGCG	Mapping of the isa mutaiton
Z4950r	TTCATGAATGAGGCCCACTTTG	Mapping of the isa mutaiton
Z1050f	ACTCTGAGTCTGCAGTCCCG	Mapping of the isa mutaiton
Z1050r	AACTGCTGCAGTTAATTATTGC	Mapping of the isa mutaiton
Z9679f	TGTGTTTTACAGACGGAGCG	Mapping of the isa mutaiton
Z9679r	ACGAGGGCGAGTGAATAATG	Mapping of the isa mutaiton
