# Supplementary material for: Sycp1 Is Not Required for Subtelomeric DNA Double-Strand Breaks but Is Required for Homologous Alignment in Zebrafish Spermatocytes
Source: Front Cell Dev Biol. 2021 Mar 26;9:664377. doi: 10.3389/fcell.2021.664377 (PMC8033029; doi:10.3389/fcell.2021.664377)
Supplement: Supplementary Table 2 — List of antibodies used in this study. [file Table_2.XLSX]

## Sheet: Antibodies
Supplementary Table 2. Antibodies used in this study
Name	Supplier	Catalog no./Ref.	Host	Type	Dilution
anti-Gapdh antibody	GeneTex	Cat.124502	Rabbit	polyclonal	1:500
anti-zSycp1	Homemade	Saito et al., 2014	Rat	polyclonal	1:500 in WB, 1:400 in IF
anti-zIho1 Nt	Homemade	This work	Mouse	polyclonal	1:50
anti-zDmc1	Homemade	Takemoto et al., 2020	Guinea pig	polyclonal	1:50
anti-gH2AX	Dr. Amatruda	-	Rabbit	polyclonal	1:500
anti-zHormad1 Ct	Homemade	This work	Mouse	polyclonal	1:100
anti-human RPA	Santacruz	sc-56770	Mouse	monoclonal	1:100
anti-zSycp2	Homemade	Takemoto et al., 2020	Guinea pig	polyclonal	1:200
anti-zSycp3	Homemade	Saito et al., 2011	Rabbit	polyclonal	1:200
Alexa Flour 488 donkey anti-rabbit IgG	Molecular Probes	A-21206	Donkey	polyclonal	1:100
Alexa Flour 488 donkey anti-rat IgG	Molecular Probes	A-21208	Donkey	polyclonal	1:150
Alexa Flour 488-conjugated goat anti-guinea pig IgG	Jackson Lab.	106-545-003	Goat	polyclonal	1:100
Alexa Flour 488-conjugated goat anti-mouse IgG	Molecular Probes	A11029	Goat	polyclonal	1:100
Alexa Flour 594-conjugated donkey anti-mouse IgG	Jackson Lab.	715-585-151	Donkey	polyclonal	1:100
Alexa Flour 594-conjugated donkey anti-rabbit IgG	Jackson Lab.	711-585-152	Donkey	polyclonal	1:100
Alexa Flour 647 Donkey anti-Guinea Pig IgG (H+L)	Jackson Lab.	706-605-148	Donkey	polyclonal	1:100
Alexa Flour 647 donkey anti-rabbit IgG	Molecular Probes	A-31573	Donkey	polyclonal	1:100
Alexa Fluor 647-AffiniPure Donkey Anti-Rat IgG (H+L)	Jackson Lab.	712-605-153	Donkey	polyclonal	1:100
DyLight 594-conjugated donkey anti-guinea pig IgG	Jackson Lab.	706-505-148	Donkey	polyclonal	1:100
anti-rabbit IgG-HRP	Santa Cruz	sc-2374	Bovine	polyclonal	1:2000
anti-rat IgG HRP	Santa Cruz	sc-2065	Goat	polyclonal	1:3000
